# Supplementary material for: Electrical, optical, and thermoelectric properties of Ga2O3(ZnO)9
Source: Royal Society of Chemistry journal article supplement (doi:10.1039/c1ra00315a), 2011-01-01
Supplement: c1ra00315a.pdf [file c1ra00315a.pdf]

## Supporting information

Fractional coordinates, atomic displacement parameters, and occupation factors for the structure model of  $\text{Ga}_2\text{O}_3(\text{ZnO})_9$ .

|            | <i>x</i> | <i>y</i> | <i>z</i> | $U_{\text{eq}}$ | <i>Occ.</i> (Zn/Ga) |
|------------|----------|----------|----------|-----------------|---------------------|
| <i>M1</i>  | 0        | 0.69785  | 0.02547  | 0.0110          | 0.818/0.182         |
| <i>M2</i>  | 0        | 0.32446  | 0.07025  | 0.0114          | 0.818/0.182         |
| <i>M3</i>  | 0        | 0.94575  | 0.11781  | 0.0119          | 0.818/0.182         |
| <i>M4</i>  | 0        | 0.56807  | 0.16033  | 0.0160          | 0.818/0.182         |
| <i>M5</i>  | 0        | 0.18843  | 0.20297  | 0.0110          | 0.818/0.182         |
| <i>M6</i>  | 0        | 0.07163  | 0.51879  | 0.0119          | 0.818/0.182         |
| <i>M7</i>  | 0        | 0.44822  | 0.56409  | 0.0128          | 0.818/0.182         |
| <i>M8</i>  | 0        | 0.82284  | 0.60655  | 0.0129          | 0.818/0.182         |
| <i>M9</i>  | 0        | 0.20121  | 0.65249  | 0.0113          | 0.818/0.182         |
| <i>M10</i> | 0        | 0.57989  | 0.70012  | 0.0112          | 0.818/0.182         |
| <i>M11</i> | 0        | 0.95841  | 0.75     | 0.0420          | 0.456/0.101         |
| <i>M12</i> | 0.5      | 0.93144  | 0.75     | 0.0154          | 0.362/0.081         |
| <i>M13</i> | 0        | 0.80742  | 0.25     | 0.0102          | 0.818/0.182         |
| <i>O1</i>  | 0        | 0.3837   | 0.0052   | 0.0292          |                     |
| <i>O2</i>  | 0        | 0.0184   | 0.0404   | 0.0200          |                     |
| <i>O3</i>  | 0        | 0.6462   | 0.0804   | 0.0162          |                     |
| <i>O4</i>  | 0        | 0.2725   | 0.1236   | 0.0138          |                     |
| <i>O5</i>  | 0        | 0.8939   | 0.1693   | 0.0126          |                     |
| <i>O6</i>  | 0        | 0.5163   | 0.2083   | 0.0464          |                     |
| <i>O7</i>  | 0        | 0.1320   | 0.25     | 0.0211          |                     |
| <i>O8</i>  | 0        | 0.7523   | 0.5349   | 0.0244          |                     |
| <i>O9</i>  | 0        | 0.1231   | 0.5761   | 0.0159          |                     |
| <i>O10</i> | 0        | 0.4984   | 0.6174   | 0.0134          |                     |
| <i>O11</i> | 0        | 0.8753   | 0.6580   | 0.0132          |                     |
| <i>O12</i> | 0        | 0.2547   | 0.7032   | 0.0114          |                     |
| <i>O13</i> | 0        | 0.6346   | 0.75     | 0.0104          |                     |

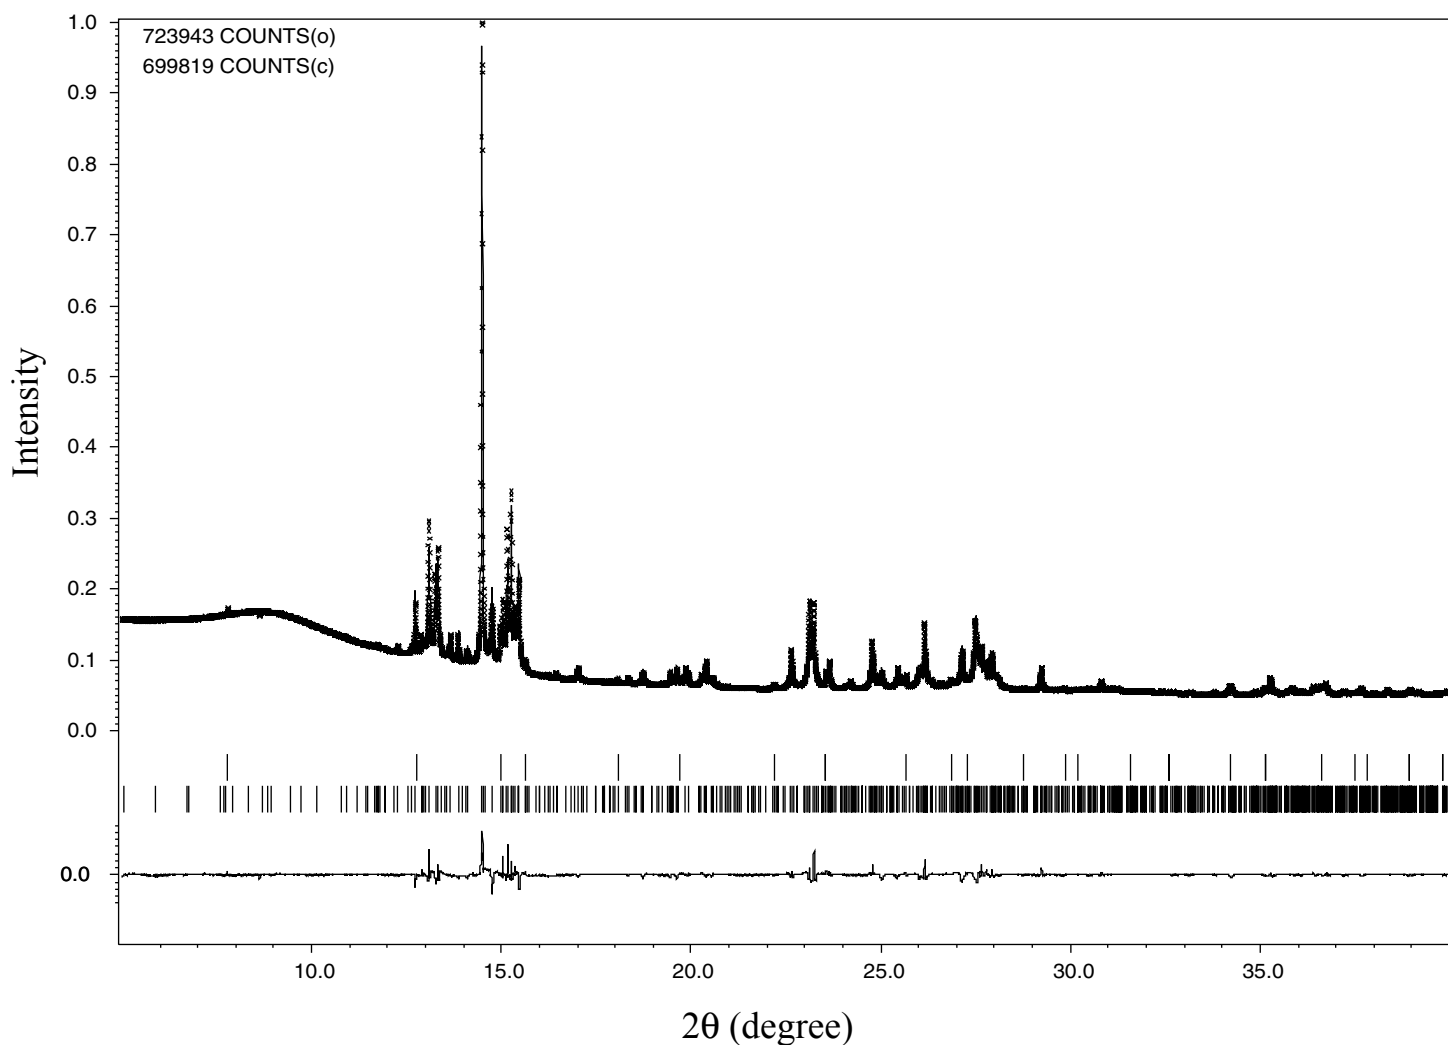

Fig. S1 Final Rietveld fit for the product of a mixture with the composition  $\text{Ga}_2\text{O}_3(\text{ZnO})_9$ . Observed data are represented by  $\times$ , and the calculated profile is by the solid line. Upper and lower ticks are positions of  $\text{Ga}_2\text{ZnO}_4$  and  $\text{Ga}_2\text{O}_3(\text{ZnO})_9$ , respectively. The difference plot is at the bottom.
